# Supplementary material for: MIROC6 Large Ensemble (MIROC6-LE): experimental design and initial analyses
Source: Copernicus journal article supplement (doi:10.5194/esd-14-1107-2023), 2023-11-07
Supplement: Supplementary file 1 [file esd-14-1107-2023-supplement.zip]

Archive with 2 entries (2 files):
- esd-14-1107-2023-supplement-title-page.pdf
- Supplementary_Data_S1.xlsx
