# Supplementary material for: MIROC6 Large Ensemble (MIROC6-LE): experimental design and initial analyses
Source: Copernicus journal article supplement (doi:10.5194/esd-14-1107-2023), 2023-11-07
Supplement: Supplementary file 1 [file esd-14-1107-2023-supplement.zip › esd-14-1107-2023-supplement-title-page.pdf]

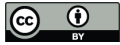

*Supplement of*

## **MIROC6 Large Ensemble (MIROC6-LE): experimental design and initial analyses**

**Hideo Shiogama et al.**

*Correspondence to:* Hideo Shiogama ([shiogama.hideo@nies.go.jp](mailto:shiogama.hideo@nies.go.jp))

- [esd-14-1107-2023-supplement-title-page.pdf](#)
- [Supplementary\\_Data\\_S1.xlsx](#)

The copyright of individual parts of the supplement might differ from the article licence.
